# Supplementary figures and images for: Exploring the Regulatory Potential of Long Non-Coding RNA in Feed Efficiency of Indicine Cattle
Source: Preprints.org preprint supplement (doi:10.20944/preprints202007.0711.v1), 2020-07-30

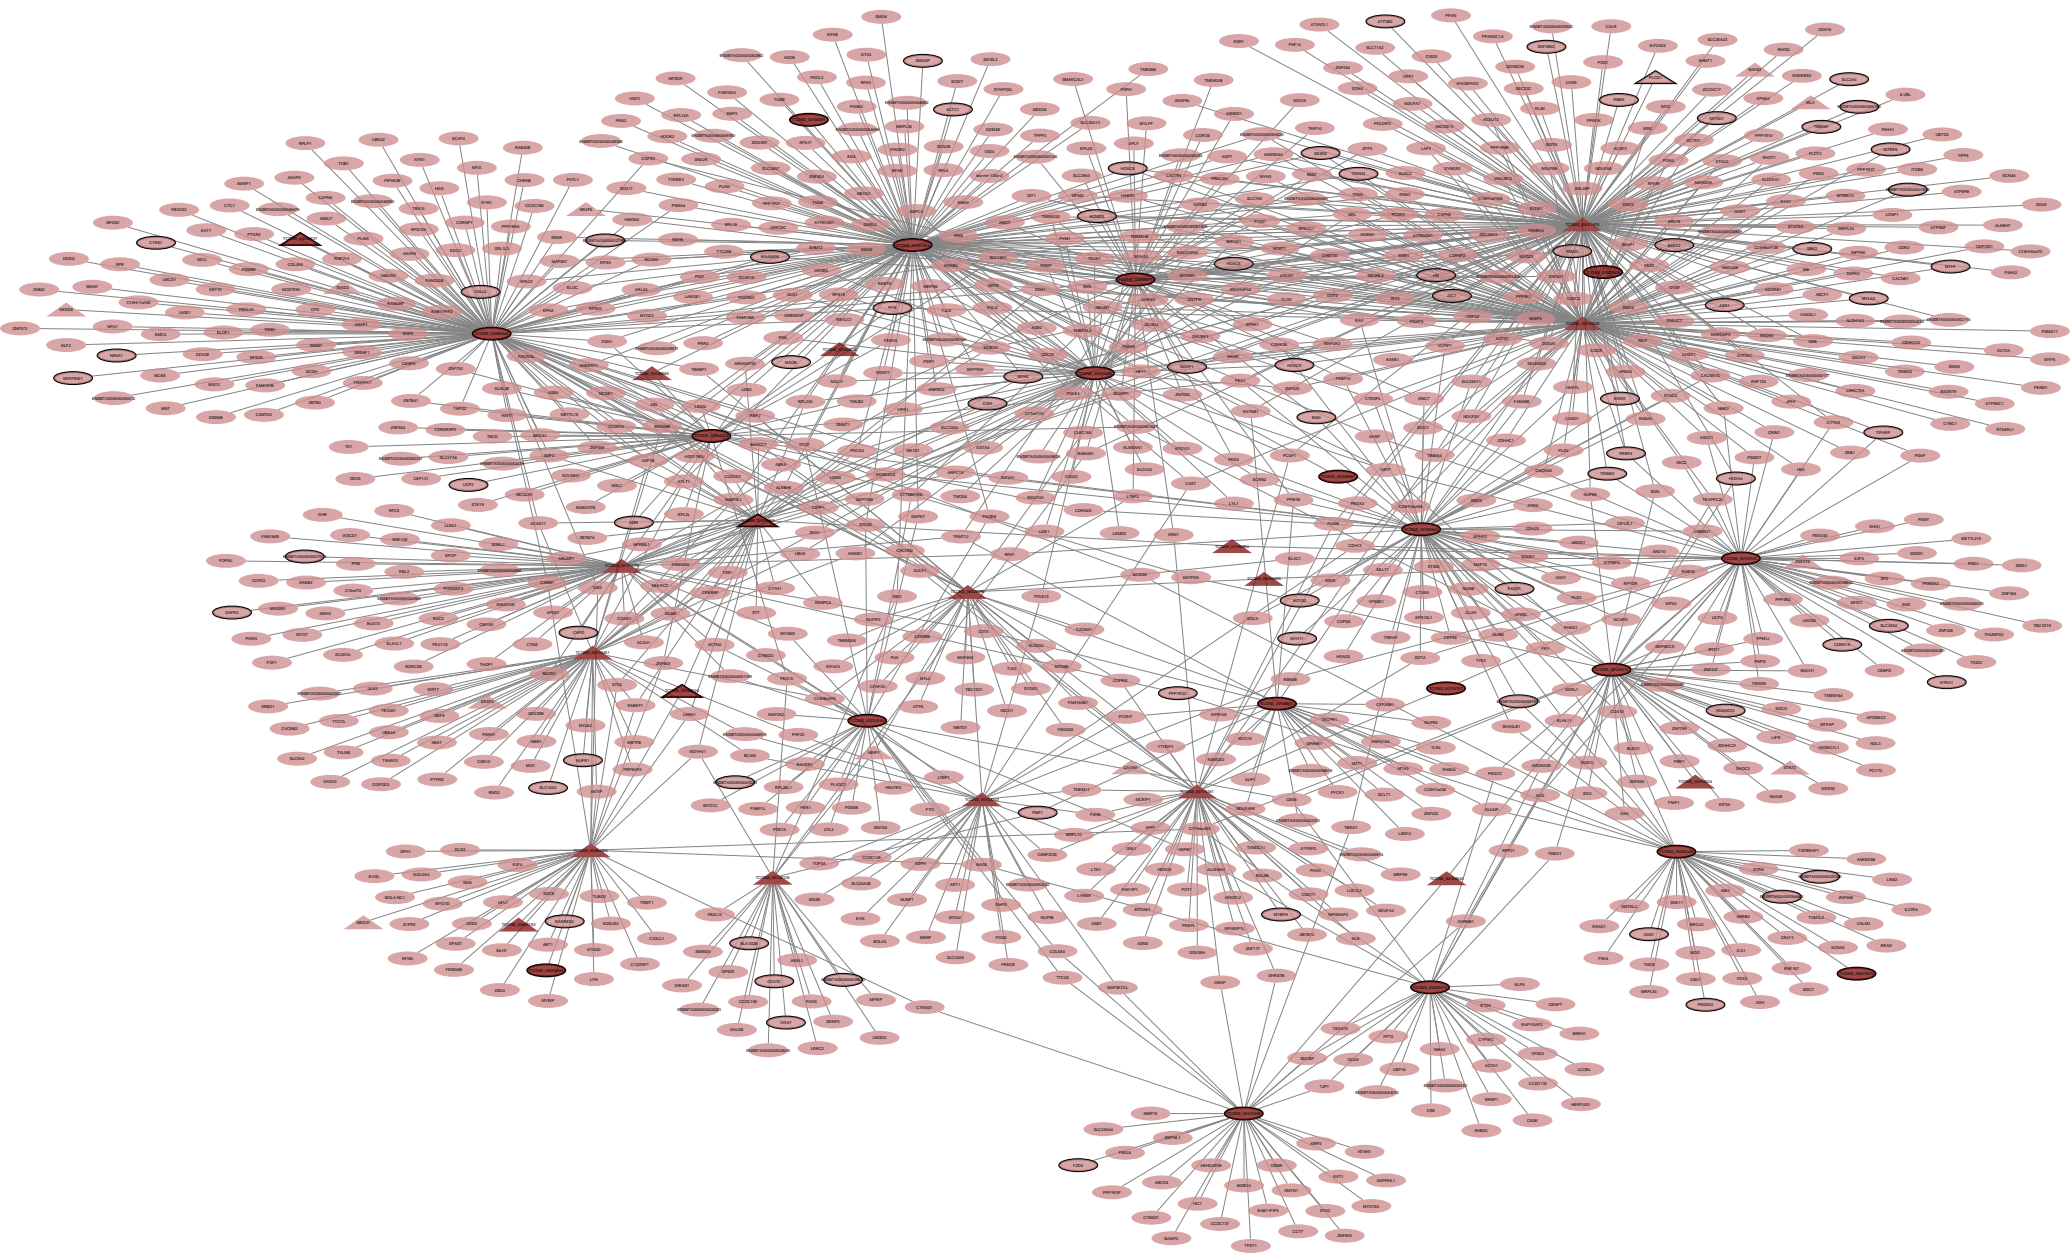

Supplement: Supplementary file 1 [file supplementary]

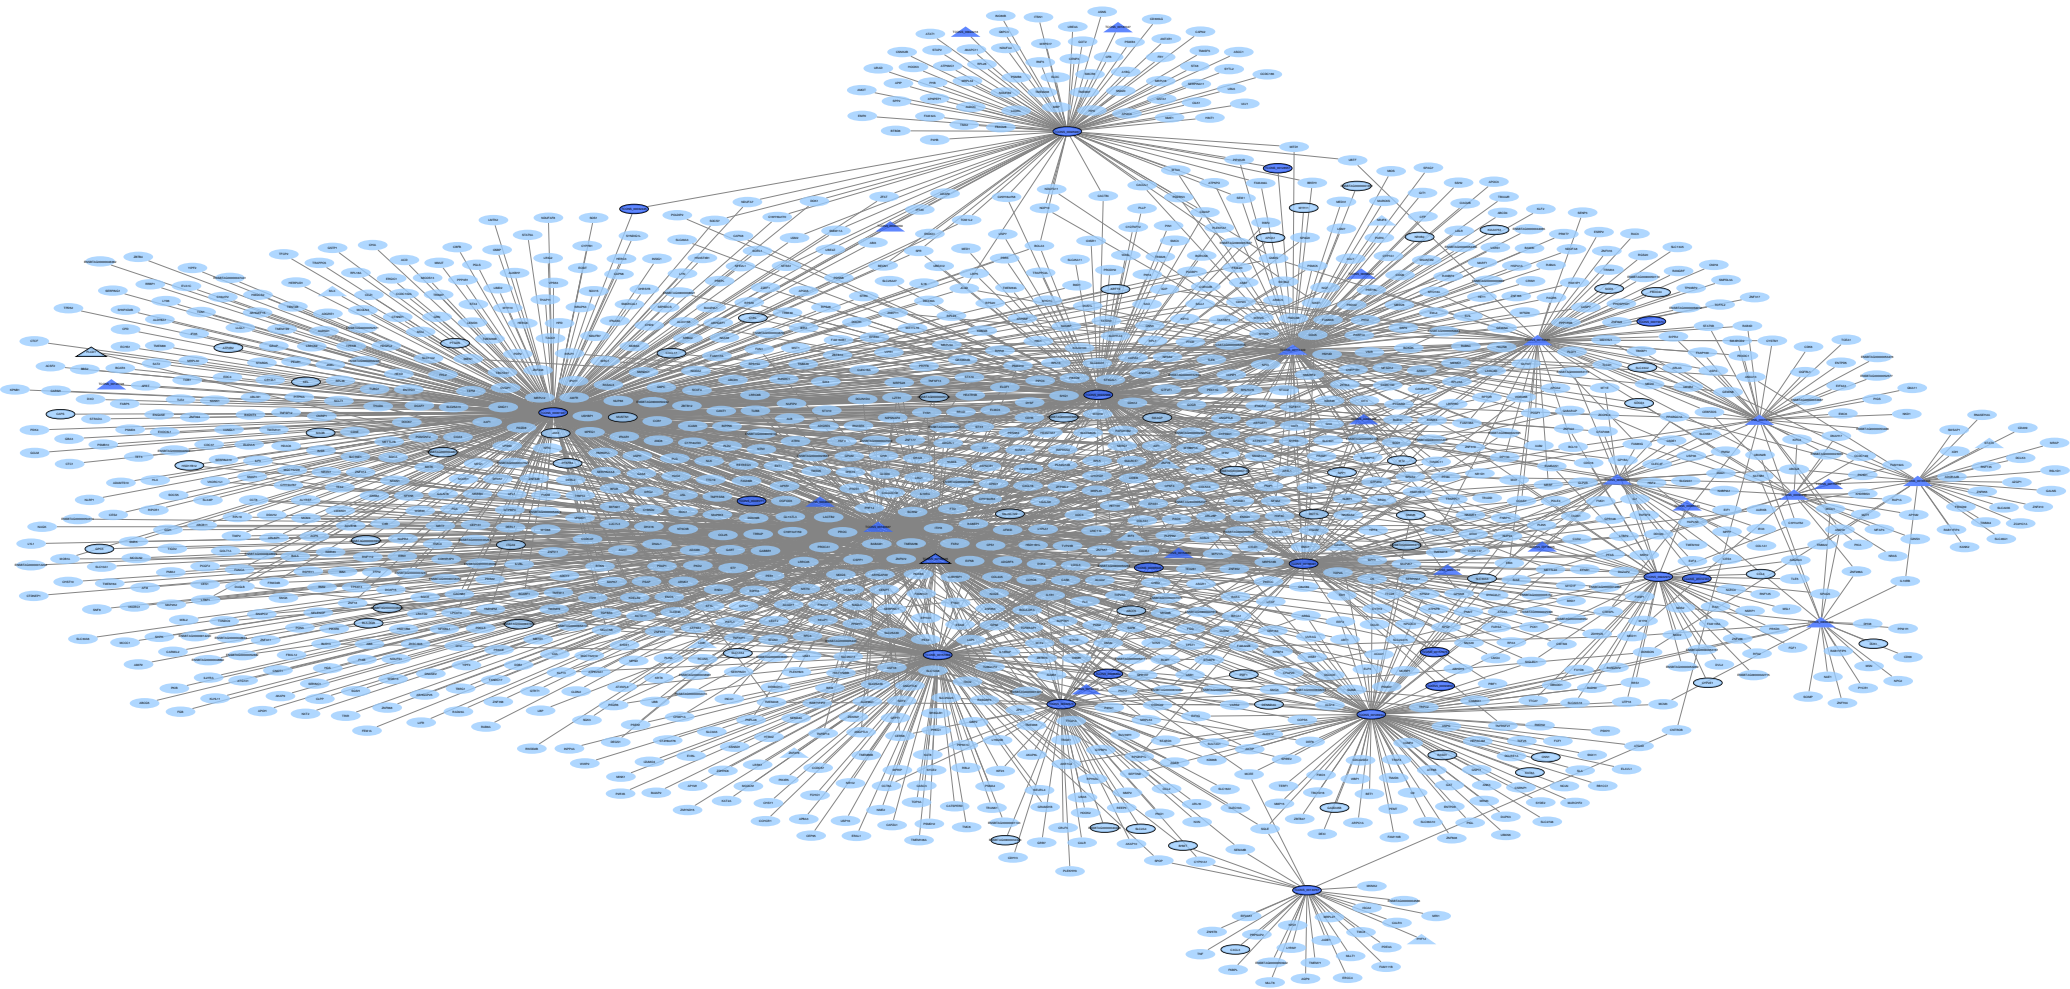

Supplement: Supplementary file 2 [file supplementary]

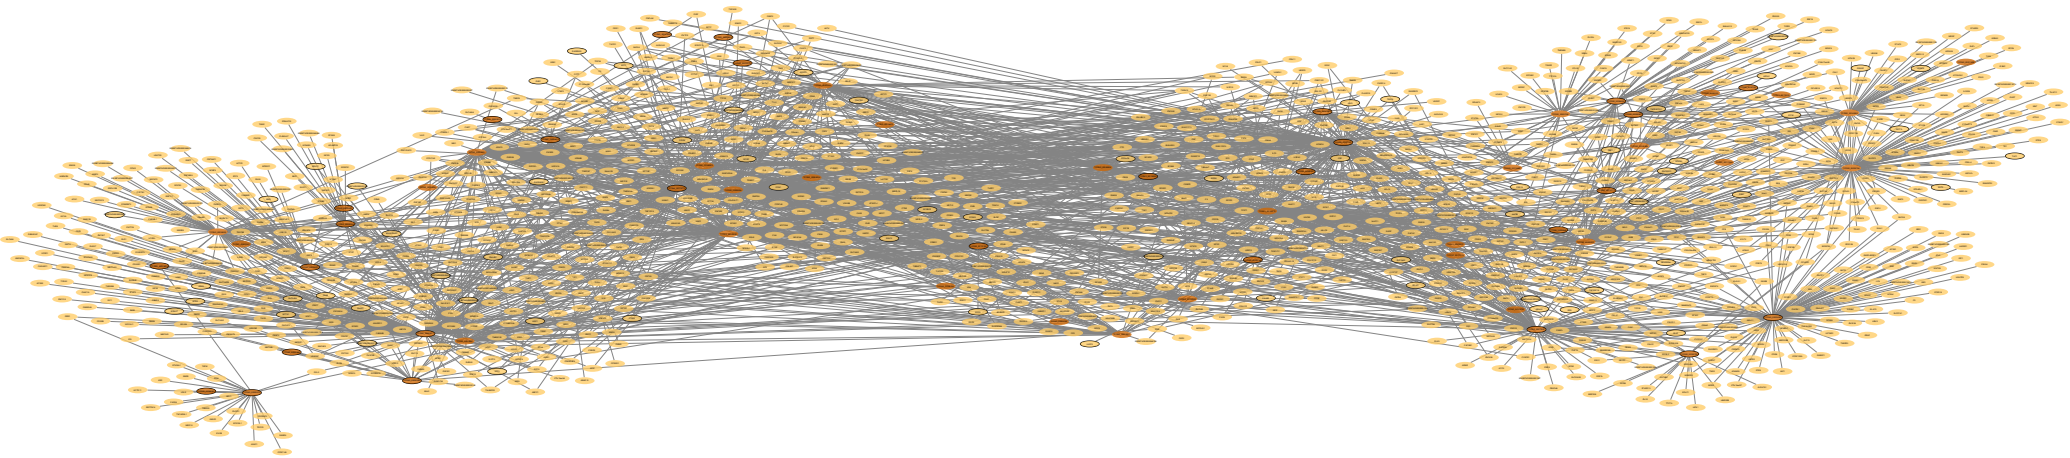

Supplement: Supplementary file 3 [file supplementary]

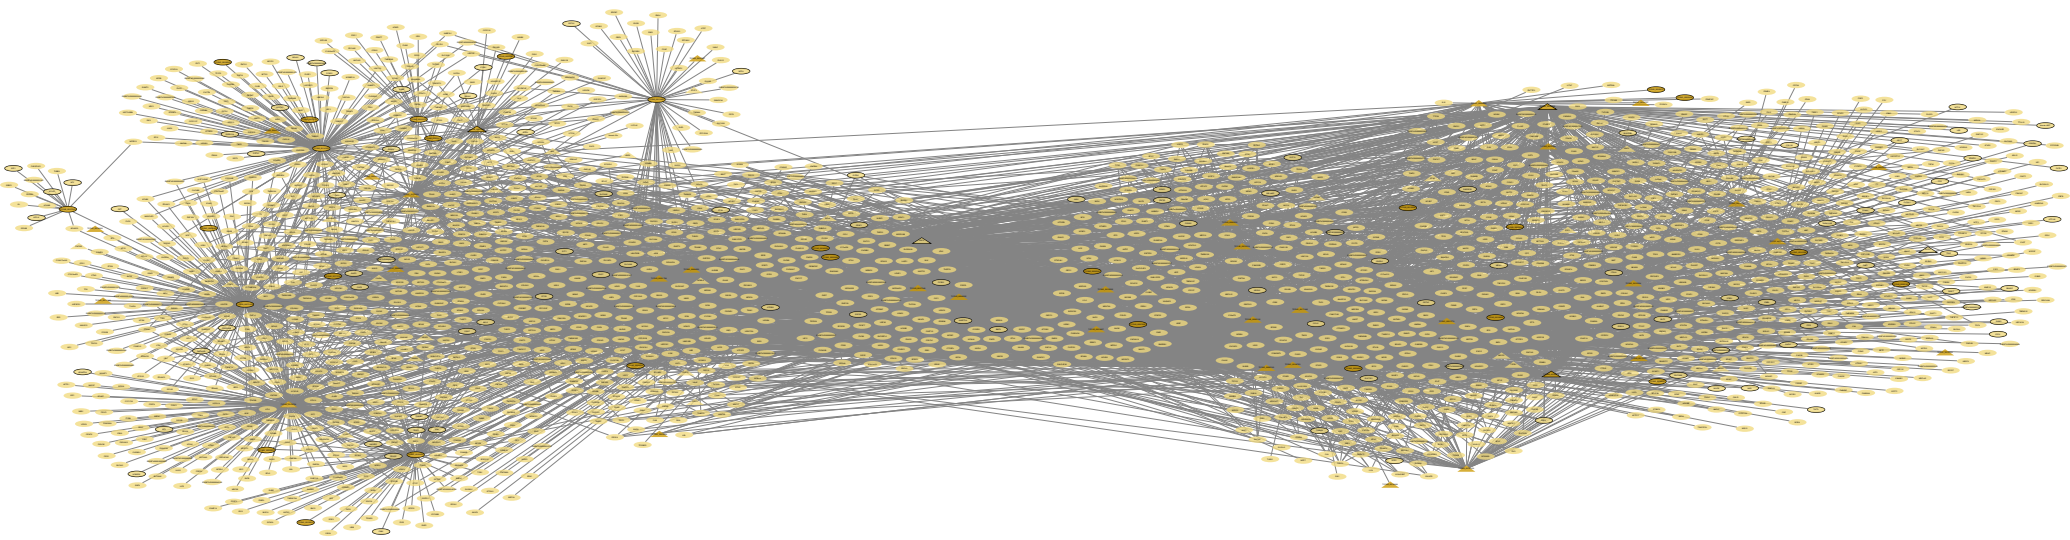

Supplement: Supplementary file 4 [file supplementary]

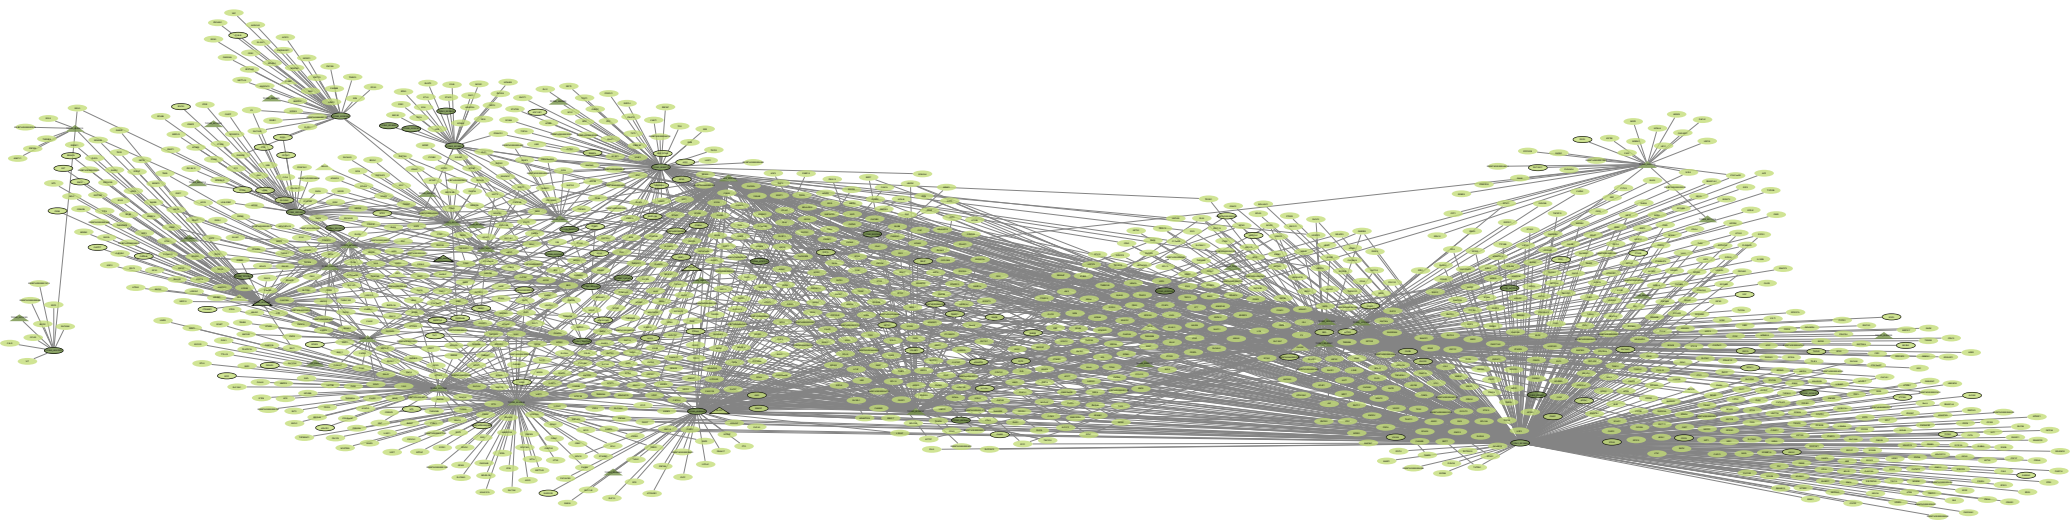

Supplement: Supplementary file 5 [file supplementary]
